# Supplementary material for: Rapid production of 38 mM H2O2 in an alcoholic suspension of a WO3 photocatalyst under visible light
Source: Royal Society of Chemistry journal article supplement (doi:10.1039/d4cc01402b), 2024-01-01
Supplement: d4cc01402b1.pdf [file d4cc01402b1.pdf]

## Electronic supplementary information for

### **Rapid production of 38 mM H<sub>2</sub>O<sub>2</sub> in an alcoholic suspension of a WO<sub>3</sub> photocatalyst under visible light**

Hiroshi Kominami,<sup>a\*</sup> Kaisei Kamitani,<sup>b</sup> Atsuhiko Tanaka,<sup>a, c</sup>

<sup>a</sup> *Department of Applied Chemistry, Faculty of Science and Engineering, Kindai University, 3-4-1, Kowakae, Higashiosaka, Osaka 577-8502, Japan.*

<sup>b</sup> *Department of Molecular and Material Engineering, Graduate School of Science and Engineering, Kindai University, 3-4-1, Kowakae, Higashiosaka, Osaka 577-8502, Japan.*

<sup>c</sup> *Precursory Research for Embryonic Science and Technology (PRESTO), Japan Science and Technology Agency (JST), 4-1-8 Honcho, Kawaguchi 332-0012, Japan.*

*E-mail: [hiro@apch.kindai.ac.jp](mailto:hiro@apch.kindai.ac.jp)*

## Experimental

### 1. Chemicals

2-Propanol (guaranteed reagents, FUJIFILM Wako Pure Chemical, Osaka, Japan) was used without further purification. Commercial  $\text{WO}_3$  (Kojundo Chemical Lab., Saitama, Japan) was used without any additional treatment.

### 2. Photocatalytic $\text{H}_2\text{O}_2$ production

Fifty mg of  $\text{WO}_3$  powder was suspended in a 2-propanol-water solvent ( $5 \text{ cm}^3$ ) in a Pyrex test tube (volume of gas phase:  $30 \text{ cm}^3$ ). The test tube was sealed with a rubber septum under  $\text{O}_2$ , set in a water bath kept at various temperatures, and then irradiated with a xenon (Xe) lamp (LA-410UV, Hayashi-Repic, Tokyo, Japan) equipped with an L-42 cut filter (light intensity of  $114 \text{ mW cm}^{-2}$ ). The temperature of the water bath was changed in the range of  $27\text{-}60^\circ\text{C}$ . The boiling point of 2-propanol is  $82^\circ\text{C}$ , and the total pressure of  $\text{O}_2$  and 2-propanol in the test tube is  $140 \text{ kPa}$  even at  $60^\circ\text{C}$ . The reactor employed in this experiment is a Pyrex test tube, which is sealed with a rubber septum. For reasons of safety, it is not possible to operate the photocatalytic reaction at temperatures exceeding  $60^\circ\text{C}$ . The amount of  $\text{O}_2$  in the gas phase was measured by gas chromatography (GC) under the conditions specified in Table S1. Acetone in the liquid phase was measured by GC under the conditions specified in Table S2. For the acetone measurement, a solution of 2-propanol ( $50 \text{ cm}^3$ ) plus toluene ( $1 \text{ cm}^3$ ) was used as an internal standard. By using a potassium iodide reagent (WAK- $\text{H}_2\text{O}_2(\text{C})$ , Kyoritsu Chemical-Check Lab., Kanagawa, Japan),  $\text{H}_2\text{O}_2$  in the liquid phase was colored and then analyzed spectrophotometrically. To assess the precision of data obtained via a photoabsorption method using potassium iodide, a  $0.35\%\text{H}_2\text{O}_2$  solution was prepared by hundred-fold dilution of a  $35\%\text{H}_2\text{O}_2$  solution (guaranteed reagents, FUJIFILM Wako Pure Chemical). The concentration was determined to be  $0.12 \text{ mol dm}^{-3}$  by a titration

method using  $0.04 \text{ mol dm}^{-3}$   $\text{KMnO}_4$  solution (for volumetric analysis, FUJIFILM Wako Pure Chemical), while the concentration was determined to be  $0.12 \text{ mol dm}^{-3}$  by the photoabsorption method. The agreement between the two concentrations indicates that the concentration determined by the photoabsorption method is accurate and reliable.

### 3. Action spectrum measurement

To investigate the efficiency of light energy utilization at specific wavelengths in photocatalytic reactions, we calculated the apparent quantum efficiency (AQE) and measured action spectra. We used 50 mg of  $\text{WO}_3$  powder in a Pyrex test tube, suspended it in a 90 vol% 2-propanol solution ( $5 \text{ cm}^3$ ), replaced the gas phase with  $\text{O}_2$ , and sealed it with a rubber septum. The suspension was irradiated with visible light from a Xe lamp equipped with band-pass filters (Asahi Spectra, Tokyo, Japan). The reaction temperature was controlled by placing the test tube in a water bath controlled at  $60^\circ\text{C}$ . The amount of  $\text{H}_2\text{O}_2$  was determined by using the same method as that described in 2-2 and then AQE was calculated using Equation S1.

$$\text{AQE} = \frac{2 \times \text{amount of } \text{H}_2\text{O}_2}{\text{number of incident photons}} \times 100. \quad (\text{S1})$$

Table S1 GC condition for analysis of O<sub>2</sub> in the gas phase

| GC                    | GC-8A (Shimadzu, Kyoto, Japan) |
|-----------------------|--------------------------------|
| Detector type         | TCD                            |
| Injection temperature | 120°C                          |
| Detector temperature  | 120°C                          |
| Column temperature    | 100°C                          |
| Current               | 60 mA                          |
| Carrier gas           | Ar                             |
| Column                | MS5A                           |

Table S2 GC condition for analysis of acetone in the liquid phase

| GC                    | GC-2014s (Shimadzu, Kyoto, Japan) |
|-----------------------|-----------------------------------|
| Detector type         | FID                               |
| Injection temperature | 150°C                             |
| Detector temperature  | 180°C                             |
| Column temperature    | 80°C                              |
| Carrier gas           | N <sub>2</sub>                    |
| Column                | PEG20M                            |

## Results

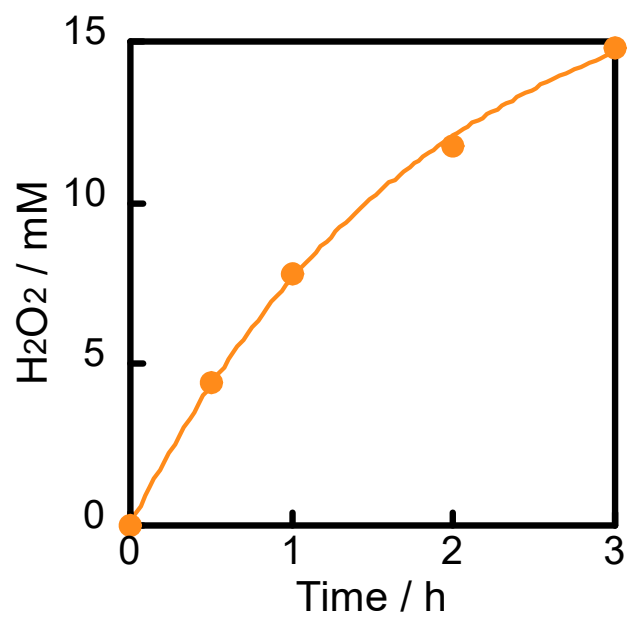

Figure S1 Time courses of photocatalytic H<sub>2</sub>O<sub>2</sub> production by O<sub>2</sub> reduction in a 2-propanol-water (9:1) suspension of Au-WO<sub>3</sub> at 60°C under irradiation of visible light.

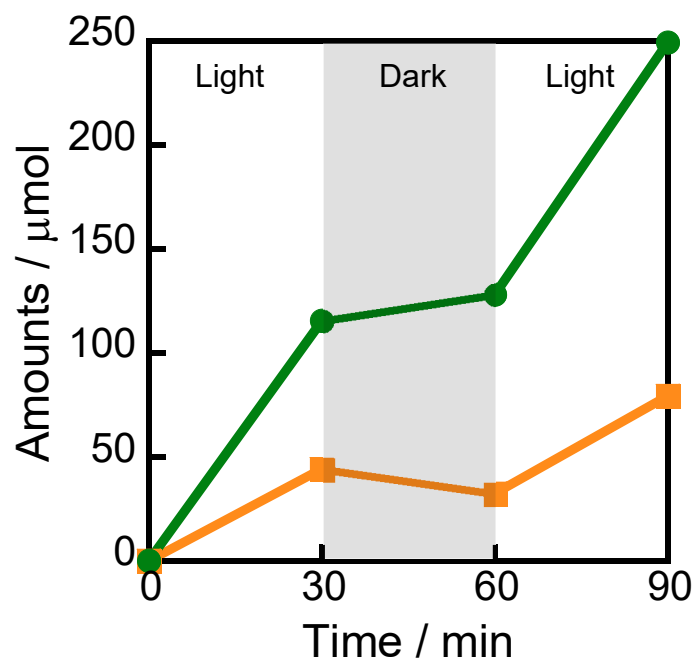

Figure S2 Time courses of photocatalytic H<sub>2</sub>O<sub>2</sub> production by O<sub>2</sub> reduction in a 2-propanol-water (9:1) suspension of WO<sub>3</sub> under irradiation of visible light and in the dark.

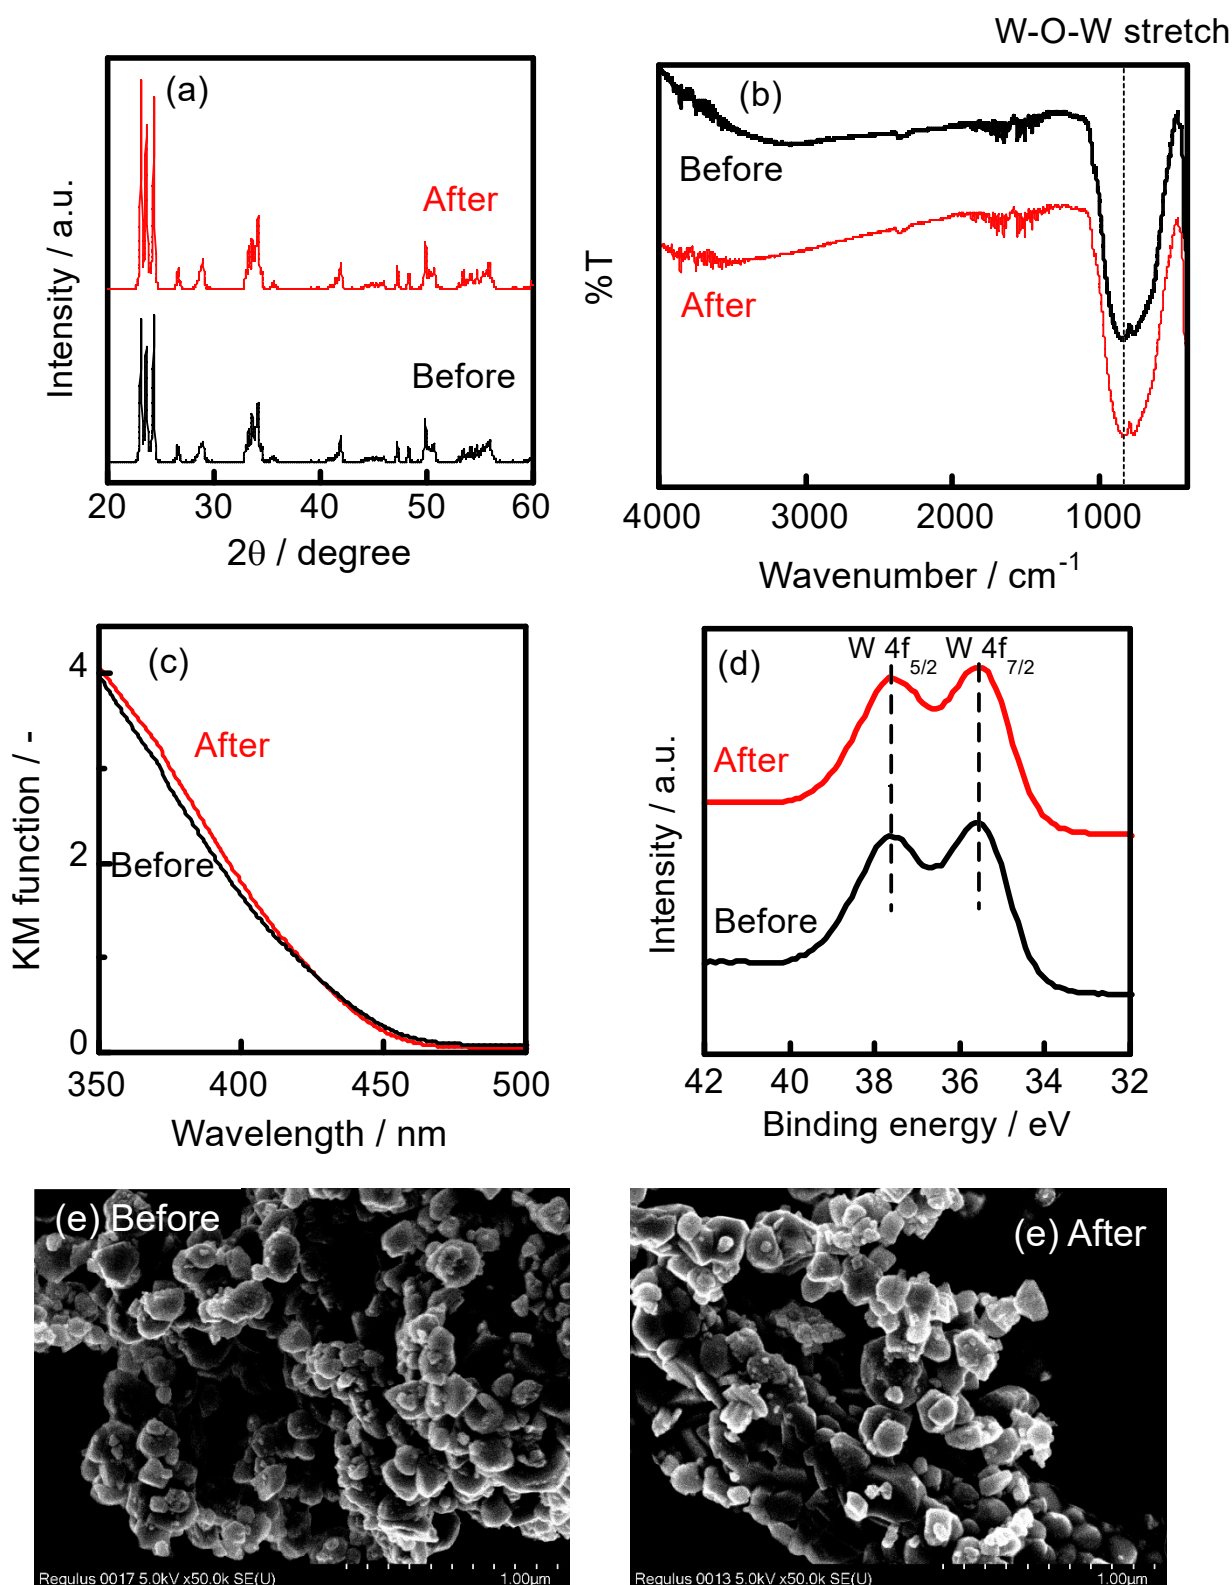

Figure S3 (a) XRD patterns, (b) FT-IR spectra, (c) UV-vis spectra, (d) XPS spectra, and (e) SEM photographs of WO<sub>3</sub> samples before and after the reaction.

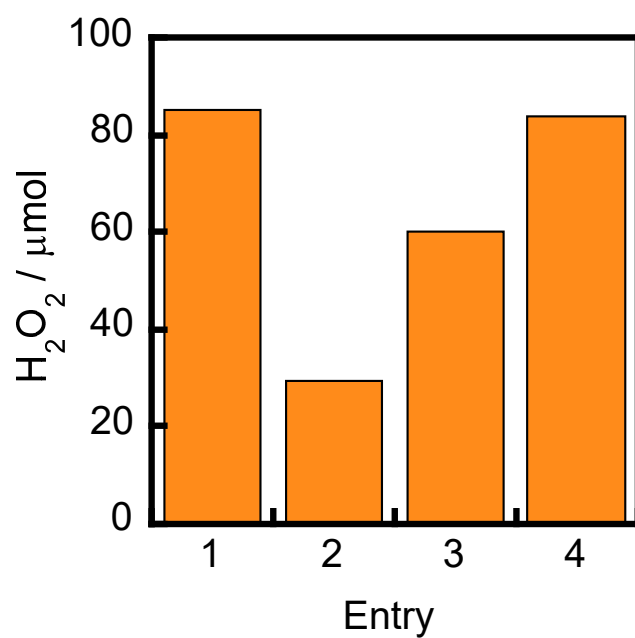

| Entry | Cycling count | Calcination temp. / °C |
|-------|---------------|------------------------|
| 1     | 0 (Fresh)     | -                      |
| 2     | 1             | -                      |
| 3     | 1             | 200                    |
| 4     | 1             | 300                    |

Figure S4 Re-used tests of the WO<sub>3</sub> photocatalyst after thermal treatment in air at various temperatures.
